# Supplementary material for: Nuclear envelope attachment of telomeres limits TERRA and telomeric rearrangements in quiescent fission yeast cells
Source: PubMed Central journal article supplement — Nucleic Acids Res. 2020 Jan 25;48(6):3029–41. doi: 10.1093/nar/gkaa043 (PMC7102995; doi:10.1093/nar/gkaa043), 2020-01-25
Supplement: gkaa043_supplemental_file.pdf [file gkaa043_supplemental_file.pdf]

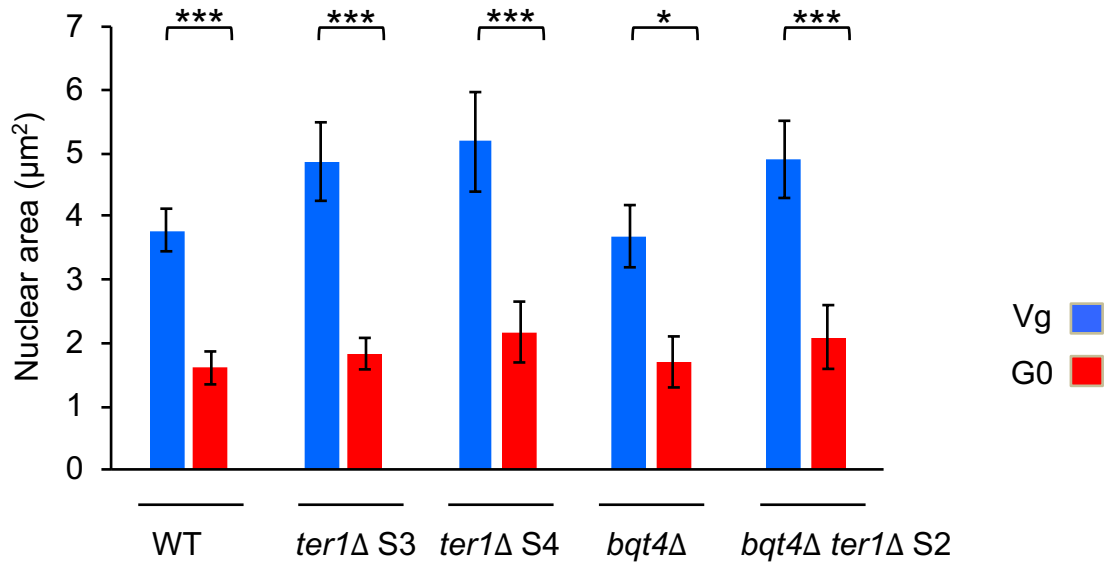

Figure S1

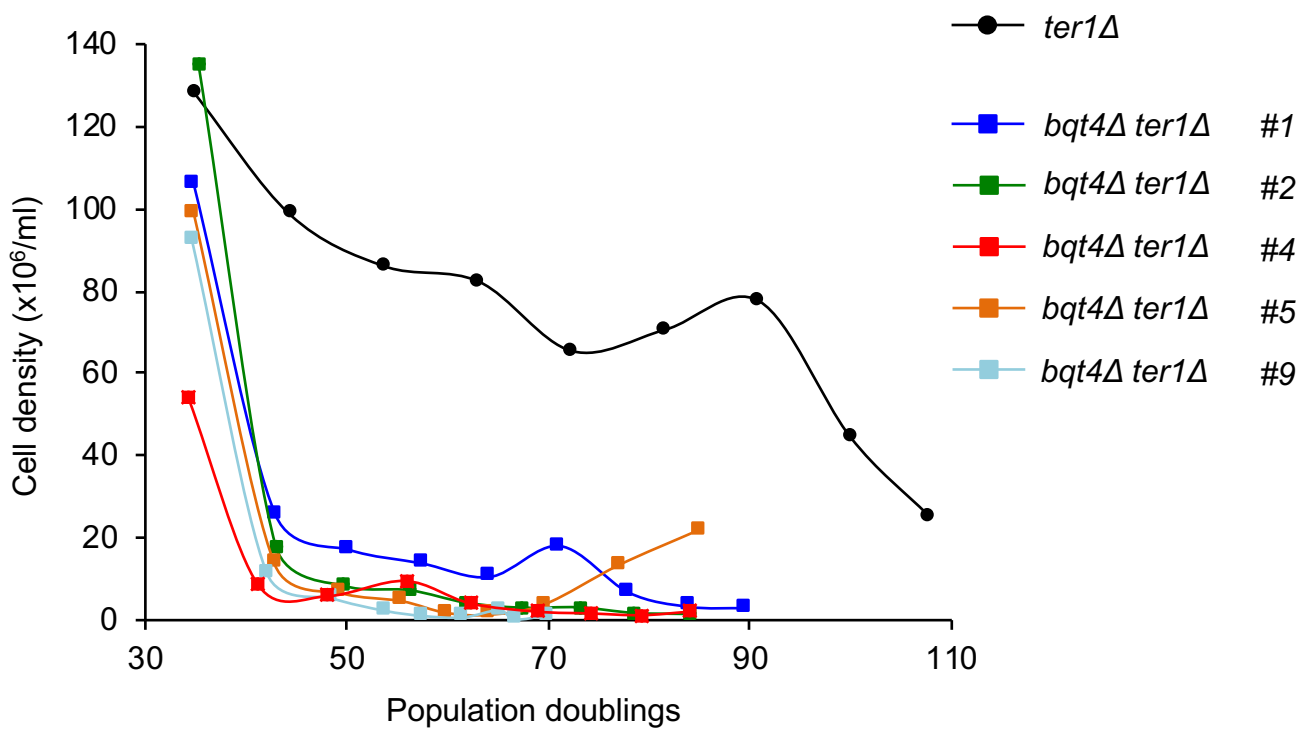

Figure S2

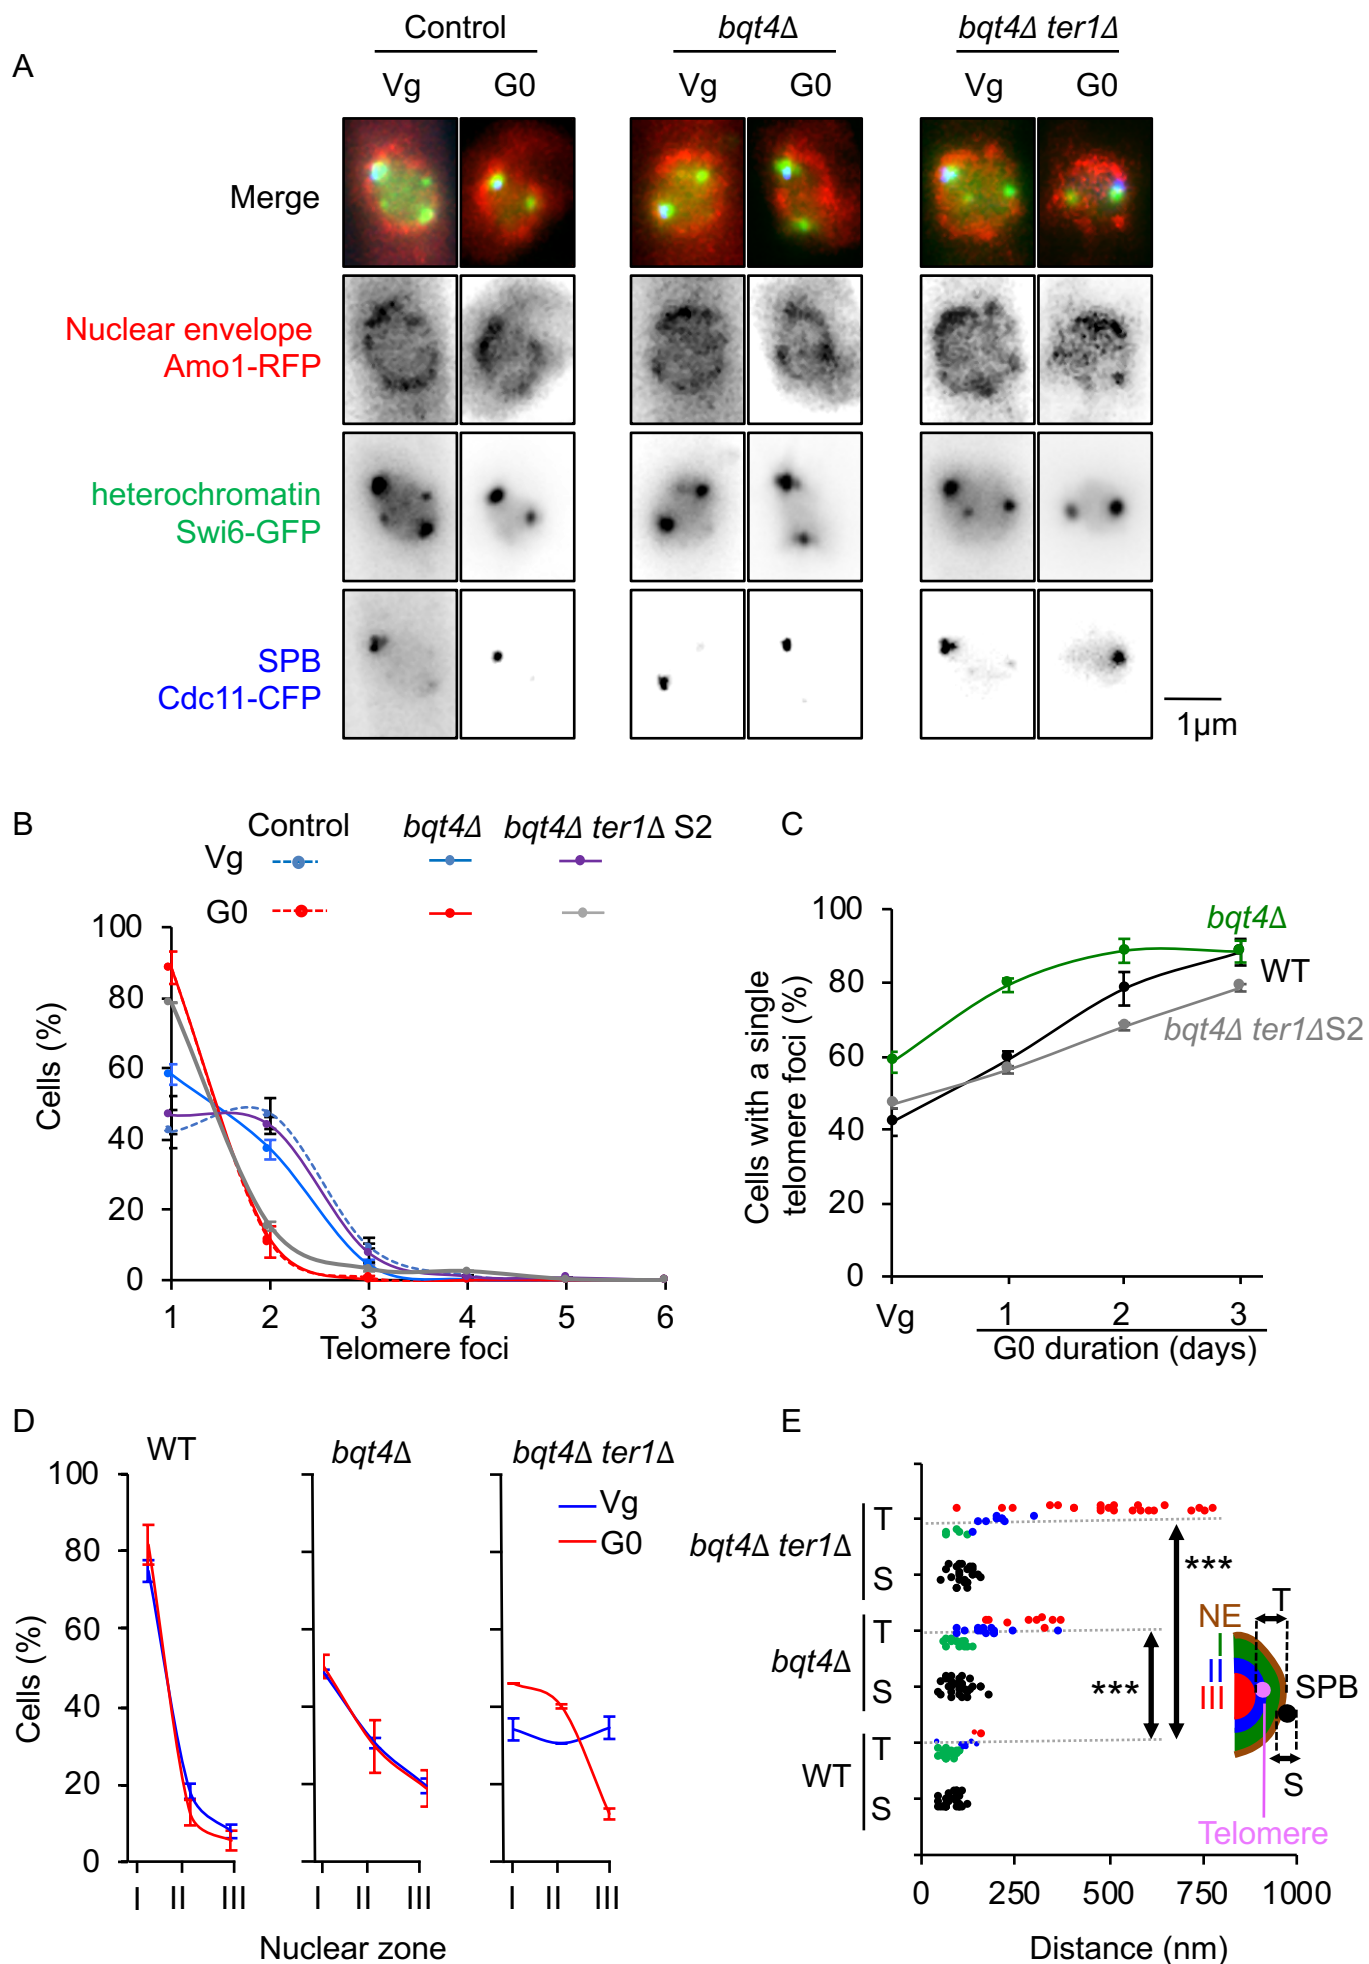

Figure S3

A

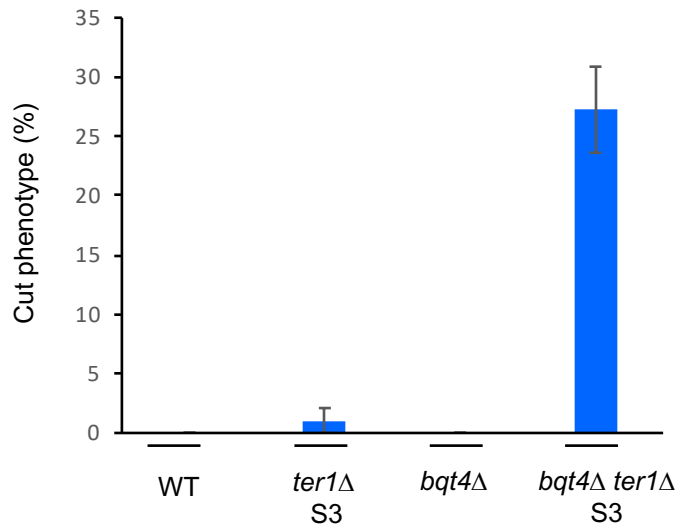

B

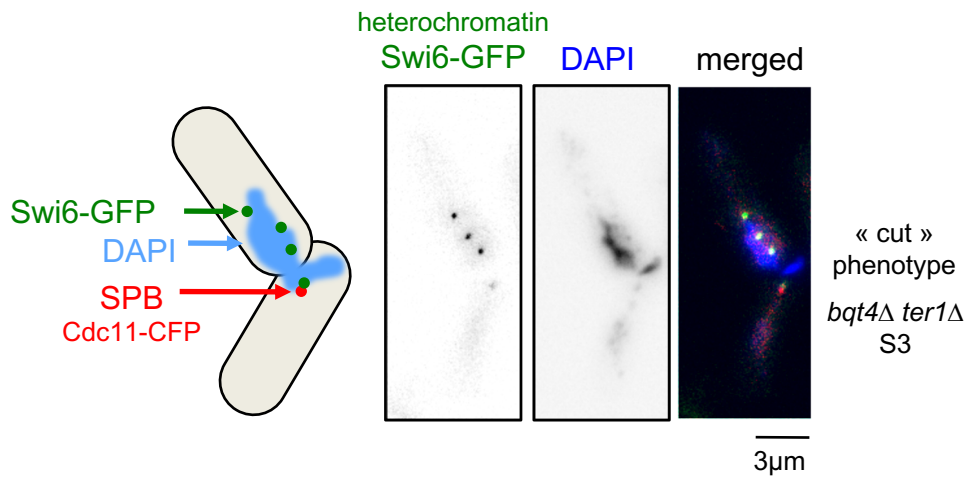

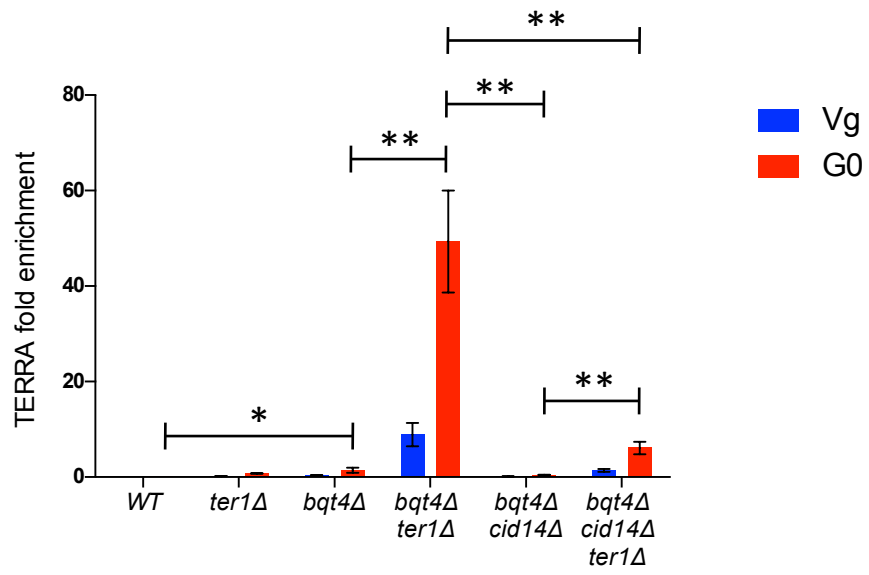

Figure S5

## Supplemental figure legends

**Figure S1:** Measurement of the average nucleus radius of indicated strains in vegetative (Vg) and quiescent (G0) state. This experiment was repeated in triplicate. Error bars represent SEM. P-values are calculated from two-tailed *t*-test. test (\*\*\*) $p < 0.0005$  ; \* $p < 0.05$ ).

**Figure S2:** Senescence curves of *bqt4* $\Delta$  *ter1* $\Delta$  cells

Freshly deleted *ter1* colonies from WT and *bqt4* $\Delta$  strains were grown in liquid YES medium for several days by serial dilutions. Population doublings were monitored by cell counting. The *bqt4* $\Delta$  *ter1* #2 clone is presented in figure 5 and S3.

**Figure S3:** Telomere localization in *bqt4* $\Delta$  *ter1* $\Delta$  cells

WT and *bqt4* $\Delta$  telomerase positive (*ter1*<sup>+</sup>) and negative (*ter1* $\Delta$ ) strains were starved from nitrogen. A) Visualization of telomeric foci, the nuclear envelope (NE) and the spindle pole body (SPB) by live microscopy in vegetative (Vg) and quiescent (G0) *ter1* $\Delta$  cells. Swi6-GFP (green), Amo1-RFP (red) and Cdc11-CFP (green) mark the telomeres and centromeres (heterochromatin), the NE and the SPBs, respectively. B) Percentage of cells that display one or several telomeric foci after 3 days in G0. For *ter1* $\Delta$  cells, imaging was processed from streak 2 (S2). C) Percentage of cells that display one telomeric focus with time in quiescence. D) Percentage of cells that display a unique telomeric hypercluster and its localization relative to the NE in the three equal concentric zones of the nucleus. E) Distance to NE of the telomeric foci in Vg and G0 cells. p-values are indicated. This experiment was repeated in triplicate and for each experiment >100 nuclei with a hyper-cluster were analyzed (\*\*\*) $p < 0.0005$ . Error bars represent SEM.

**Figure S4:** *bqt4* $\Delta$  *ter1* $\Delta$  cells exhibit a high level of “cut” phenotype

A) “cut” phenotype were quantified in WT and *bqt4* $\Delta$  growing cells, in telomerase plus and *ter1* $\Delta$  background from streak 3 (S3). B) Example of “cut” phenotype observed by fluorescent microscopy. Swi6-GFP (green) and Cdc11-CFP (red) mark telomeres and centromeres (heterochromatin) and the SPBs, respectively. DAPI (blue) marks chromatin. In “cut” cells, the nucleus is divided in two parts by the septum.

**Figure S5:** TERRA level determination in vegetative (Vg) and in quiescent (G0) cells. RNA was extracted in vegetative (Vg) and in quiescent (G0 after 48H) cells from the indicated strains. RNA levels were determined by RT-qPCR using a random hexanucleotide primer followed by qPCR with specific oligonucleotides for TERRA and control Fcp1. TERRA fold enrichment was determined as the ratio of TERRA over Fcp1 RNA levels (\* $p < 0.05$ ; \*\* $p < 0.005$ ). Error bars represent SEM.
